# Supplementary material
Source: bioRxiv or medRxiv preprint supplement (https://www.biorxiv.org/highwire/filestream/10190/field_highwire_adjunct_files/0/024067-1.pdf)
Supplement: Supplementary file [file 024067-1.pdf]

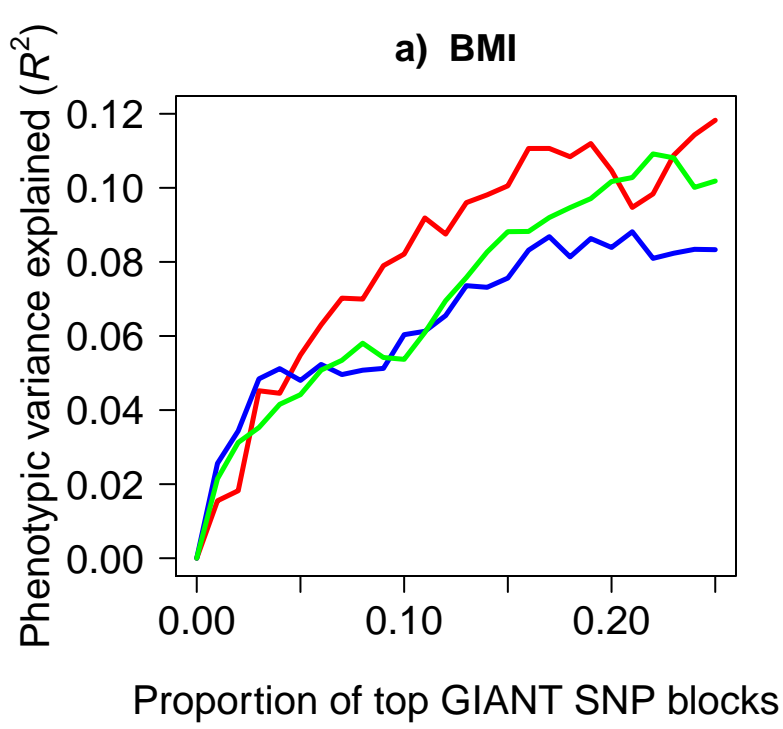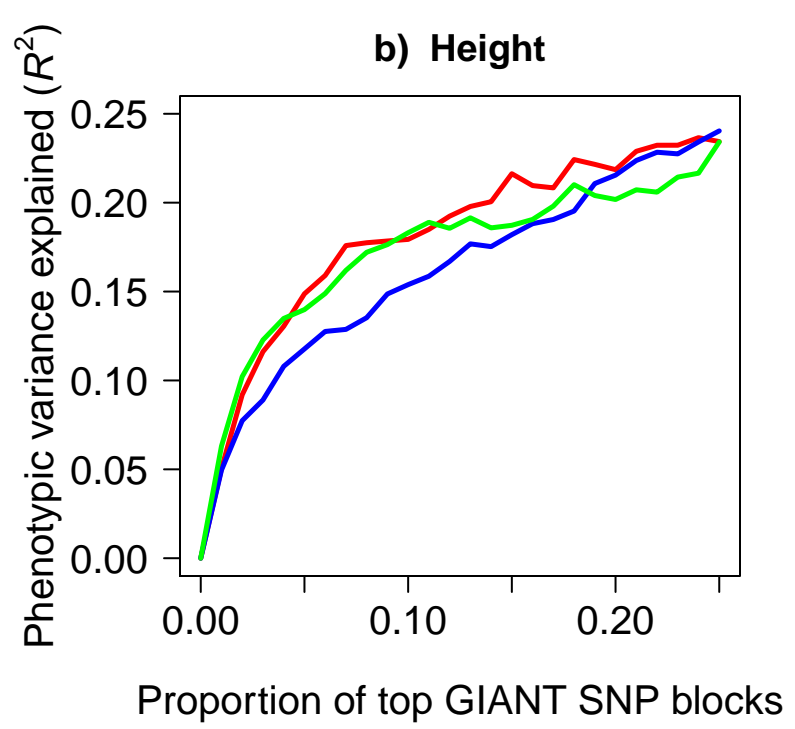

Figure S2: Genetic variance as a function of proportion of top SNP blocks using LD from 1000G
